# Supplementary material for: Hollow metallic 1T MoS2 arrays grown on carbon cloth: a freestanding electrode for sodium ion batteries
Source: Royal Society of Chemistry journal article supplement (doi:10.1039/c8ta06905k), 2018-01-01
Supplement: c8ta06905k1.pdf [file c8ta06905k1.pdf]

# Hollow metallic 1T MoS<sub>2</sub> arrays grown on carbon cloth: a freestanding electrode for sodium ion batteries

Wang-jia Tang <sup>a</sup>, Xiu-li Wang <sup>a\*</sup>, Dong Xie <sup>b</sup>, Xin-hui Xia <sup>a,\*</sup>, Chang-dong Gu <sup>a</sup>, and  
Jiang-ping Tu <sup>a,\*</sup>

a. State Key Laboratory of Silicon Materials, Key Laboratory of Advanced Materials and Applications for Batteries of Zhejiang Province, and School of Materials Science and Engineering, Zhejiang University, Hangzhou 310027, China

b. Guangdong Engineering and Technology Research Center for Advanced Nanomaterials, School of Environment and Civil Engineering, Dongguan University of Technology, Dongguan 523808, China

---

\* Corresponding author. Tel.: +86 571 87952573; Fax: +86 571 87952856.

*E-mail address:* wangxl@zju.edu.cn; [helloxxh@zju.edu.cn](mailto:helloxxh@zju.edu.cn) (X. H. Xia); [tujp@zju.edu.cn](mailto:tujp@zju.edu.cn) (J. P. Tu)

**Table S1.** Comparison of electrochemical performance of MoS<sub>2</sub> based anode materials for SIBs.

| <b>Anode materials</b>             | <b>Initial capacity</b>   | <b>Current density</b> | <b>Stable capacity after n-cycles</b>      | <b>Initial Coulombic efficiency</b> | <b>Ref.</b> |
|------------------------------------|---------------------------|------------------------|--------------------------------------------|-------------------------------------|-------------|
| <b>3D-ANCNT @MoS<sub>2</sub></b>   | 945.6 mAh g <sup>-1</sup> | 0.1 A·g <sup>-1</sup>  | 579.4 mAh·g <sup>-1</sup> after 100 cycles | 75.2%                               | 1           |
| <b>MoS<sub>2</sub>/CNFs</b>        | 1,238 mAh g <sup>-1</sup> | 0.1 A·g <sup>-1</sup>  | 500 mAh·g <sup>-1</sup> after 80 cycles    | 50%                                 | 2           |
| <b>MoS<sub>2</sub>@C-C MC</b>      | 556 mAh g <sup>-1</sup>   | 80 mA·g <sup>-1</sup>  | 286 mA h g <sup>-1</sup> after 100 cycles  | 79.4%                               | 3           |
| <b>N-C@MoS<sub>2</sub></b>         | 810 mAh g <sup>-1</sup>   | 150 mA·g <sup>-1</sup> | 340 mAh g <sup>-1</sup> after 150 cycles   | 71.5%                               | 4           |
| <b>MoS<sub>2</sub>/C</b>           | 681 mAh g <sup>-1</sup>   | 0.1 A·g <sup>-1</sup>  | 447 mAh g <sup>-1</sup> after 100 cycles   | 73%                                 | 5           |
| <b>MoS<sub>2</sub>/PANI</b>        | 888 mAh g <sup>-1</sup>   | 300 mA·g <sup>-1</sup> | 456 mAh g <sup>-1</sup> after 100 cycles   | 83.2%                               | 6           |
| <b>1T MoS<sub>2</sub>-graphene</b> | 630 mAh g <sup>-1</sup>   | 50 mA·g <sup>-1</sup>  | 313 mAh g <sup>-1</sup> for 200 cycles.    | 64%                                 | 7           |
| <b>1T-MoS<sub>2</sub>/CC</b>       | 989 mAh g <sup>-1</sup>   | 200 mA·g <sup>-1</sup> | 576 mAh g <sup>-1</sup> after 200 cycles   | 77.7 %                              | This work   |

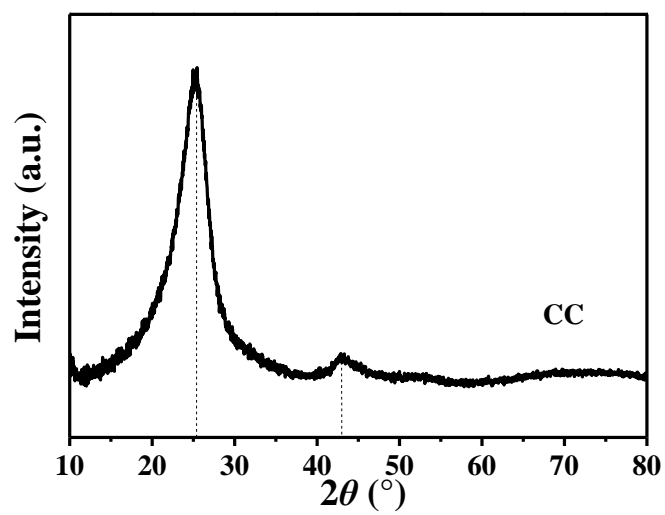

**Fig. S1.** XRD pattern of carbon cloth.

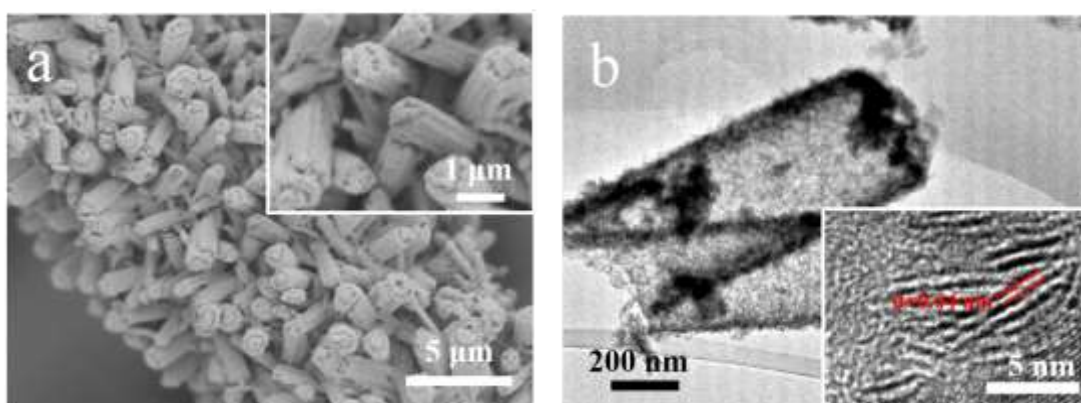

**Fig. S2.** (a) SEM images of 2H-MoS<sub>2</sub>/CC; (b) TEM and HRTEM images of 2H-MoS<sub>2</sub>/CC.

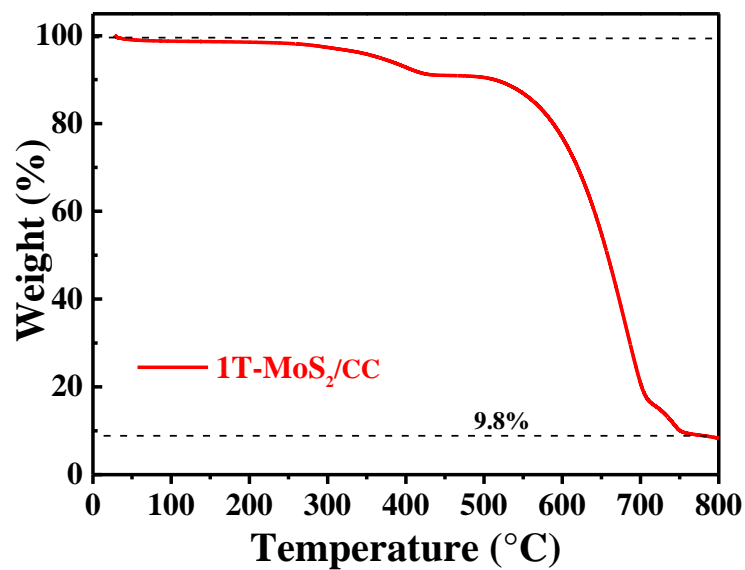

Fig. S3. TGA curve of 1T-MoS<sub>2</sub>/CC arrays in air.

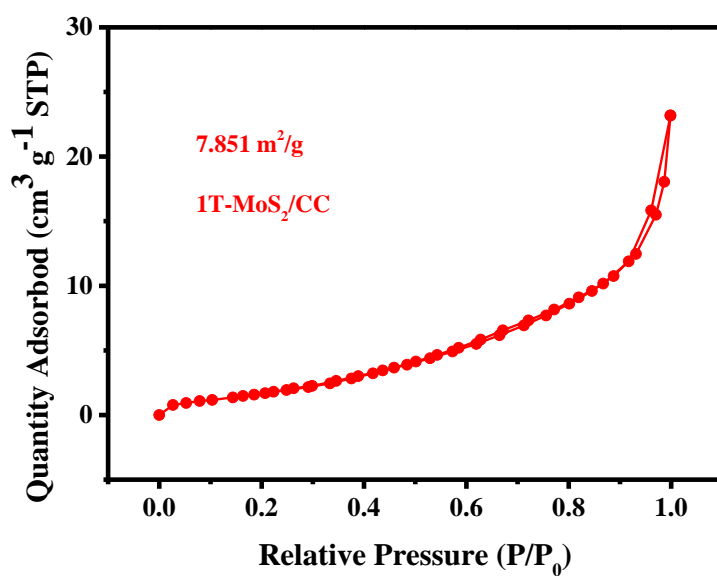

Fig. S4. Nitrogen adsorption-desorption isotherm curve of 1T-MoS<sub>2</sub>/CC arrays.

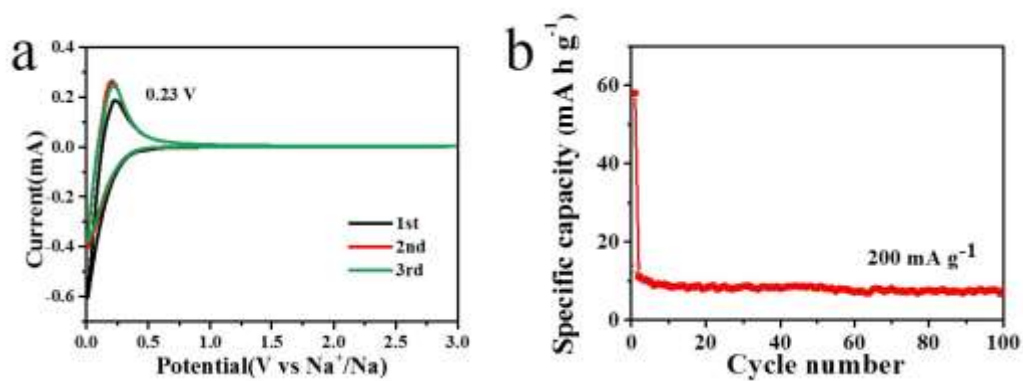

**Fig. S5.** (a) CV curves of carbon cloth electrode for SIBs for the first three cycles; (b) cycling performance of carbon cloth for SIBs.

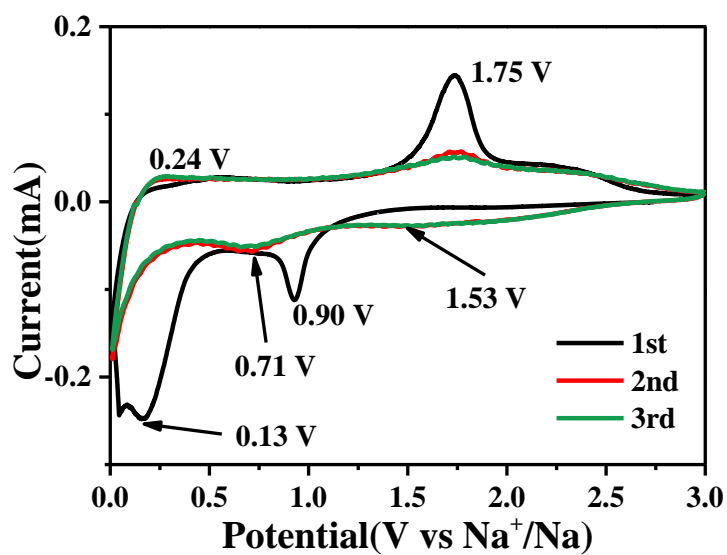

**Fig. S6.** CV curves of 2H-MoS<sub>2</sub>/CC electrode at a scan rate of 0.1 mV s<sup>-1</sup> for the first three cycles.

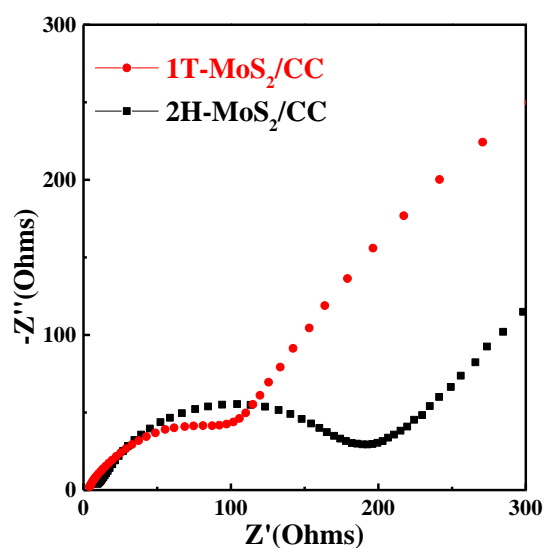

**Fig. S7.** Nyquist plots of 2H-MoS<sub>2</sub>/CC and 1T-MoS<sub>2</sub>/CC electrodes after the initial cycle.

## Reference

1. X. J. Zhao, G. Wang, X. J. Liu, X. L. Zheng and H. Wang, *Nano Res.*, 2018, 11, 3603-3618.
2. H. Yang, M. Wang, X. W. Liu, Y. Jiang and Y. Yu, *Nano Res.*, 2018, 11, 3844-3853.
3. X. Q. Xie, T. Makaryan, M. Q. Zhao, K. L. Van Aken, Y. Gogotsi and G. X. Wang, *Adv. Energy Mater.*, 2016, 6, 1502161.
4. D. Xie, X. H. Xia, Y. D. Wang, D. H. Wang, Y. Zhong, W. J. Tang, X. L. Wang and J. P. Tu, *Chem. Eur. J.*, 2016, 22, 11617-11623.
5. J. X. Wu, Z. H. Lu, K. K. Li, J. Cui, S. S. Yao, M. Ihsan-ul Haq, B. H. Li, Q. H. Yang, F. Y. Kang, F. Ciucci and J.-K. Kim, *J. Mater. Chem.A*, 2018, 6, 5668-5677.

6. H. Y. Wang, H. Jiang, Y. J. Hu, N. Li, X. J. Zhao and C. Z. Li, *J. Mater. Chem.A*, 2017, 5, 5383-5389.
7. X. M. Geng, Y. C. Jiao, Y. Han, A. Mukhopadhyay, L. Yang and H. L. Zhu, *Adv. Funct. Mater.*, 2017, 27, 1702998.
